RESEARCH ARTICLE

# QTLs Associated with Agronomic Traits in the Cutler × AC Barrie Spring Wheat Mapping Population Using Single Nucleotide Polymorphic Markers

Enid Perez-Lara<sup>1</sup>, Kassa Semagn<sup>1</sup>, Hua Chen<sup>1</sup>, Muhammad Iqbal<sup>1,5</sup>, Amidou N'Diaye<sup>2</sup>, Atif Kamran<sup>3</sup>, Alireza Navabi<sup>4</sup>, Curtis Pozniak<sup>2</sup>, Dean Spaner<sup>1\*</sup>

**1** Department of Agricultural, Food and Nutritional Science, 4–10 Agriculture-Forestry Centre, University of Alberta, Edmonton, AB T6G 2P5, Canada, **2** Crop Development Centre and Department of Plant Sciences, University of Saskatchewan, 51 Campus Drive, Saskatoon, SK S7N 5A8, Canada, **3** Seed Centre, Department of Botany, The University of Punjab, New Campus, Lahore, 54590, Pakistan, **4** Department of Plant Agriculture, Crop Science Building, University of Guelph, Guelph, ON N1G 2W1, Canada, **5** National Institute for Genomics and Advanced Biotechnology, National Agricultural Research Centre, Park Road, Islamabad 45500, Pakistan

\* [dspaner@ualberta.ca](mailto:dspaner@ualberta.ca)

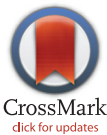

OPEN ACCESS

**Citation:** Perez-Lara E, Semagn K, Chen H, Iqbal M, N'Diaye A, Kamran A, et al. (2016) QTLs Associated with Agronomic Traits in the Cutler × AC Barrie Spring Wheat Mapping Population Using Single Nucleotide Polymorphic Markers. PLoS ONE 11(8): e0160623. doi:10.1371/journal.pone.0160623

**Editor:** David D Fang, USDA-ARS Southern Regional Research Center, UNITED STATES

**Received:** May 21, 2016

**Accepted:** July 24, 2016

**Published:** August 11, 2016

**Copyright:** © 2016 Perez-Lara et al. This is an open access article distributed under the terms of the [Creative Commons Attribution License](https://creativecommons.org/licenses/by/4.0/), which permits unrestricted use, distribution, and reproduction in any medium, provided the original author and source are credited.

**Data Availability Statement:** All relevant data are within the paper and its Supporting Information files.

**Funding:** This research was supported by grants to the University of Alberta wheat breeding program from the Alberta Crop Industry Development Fund, Alberta Wheat Commission, Agriculture and Agri-Food Canada, Western Grains Research Foundation Endowment Fund and Core Program check-off funds, and an NSERC Collaborative Grant to DS. This work was conducted in part within the project "Canadian Triticum Advancement Through Genomics (CTAG)." The authors would like to acknowledge CTAG funding

## Abstract

We recently reported three earliness *per se* quantitative trait loci (QTL) associated with flowering and maturity in a recombinant inbred lines (RILs) population derived from a cross between the spring wheat (*Triticum aestivum* L.) cultivars 'Cutler' and 'AC Barrie' using 488 microsatellite and diversity arrays technology (DART) markers. Here, we present QTLs associated with flowering time, maturity, plant height, and grain yield using high density single nucleotide polymorphic (SNP) markers in the same population. A mapping population of 158 RILs and the two parents were evaluated at five environments for flowering, maturity, plant height and grain yield under field conditions, at two greenhouse environments for flowering, and genotyped with a subset of 1809 SNPs out of the 90K SNP array and 2 functional markers (*Ppd-D1* and *Rht-D1*). Using composite interval mapping on the combined phenotype data across all environments, we identified a total of 19 QTLs associated with flowering time in greenhouse (5), and field (6) conditions, maturity (5), grain yield (2) and plant height (1). We mapped these QTLs on 8 chromosomes and they individually explained between 6.3 and 37.8% of the phenotypic variation. Four of the 19 QTLs were associated with multiple traits, including a QTL on 2D associated with flowering, maturity and grain yield; two QTLs on 4A and 7A associated with flowering and maturity, and another QTL on 4D associated with maturity and plant height. However, only the QTLs on both 2D and 4D had major effects, and they mapped adjacent to well-known photoperiod response *Ppd-D1* and height reducing *Rht-D1* genes, respectively. The QTL on 2D reduced flowering and maturity time up to 5 days with a yield penalty of 436 kg ha<sup>-1</sup>, while the QTL on 4D reduced plant height by 13 cm, but increased maturity by 2 days. The high density SNPs allowed us to map eight moderate effect, two major effect, and nine minor effect QTLs that were not identified in our previous study using microsatellite and DART markers. Results from this study provide

provided by the Saskatchewan Ministry of Agriculture, Western Grains Research Foundation, Agriculture and Agri-Food Canada, Genome Canada, Genome Prairie, Genome Alberta and Alberta Innovates. The study was also supported by a Canadian Wheat Board fellowship (CWB) to the sixth (AK), and a Chinese Government Scholarship to the third (HC) author, and Pakistani Government Fellowships to the fourth (MI) and sixth (AK) authors.

**Competing Interests:** The authors have declared that no competing interests exist.

additional information to wheat researchers developing early maturing and short stature spring wheat cultivars.

## Background

Global hexaploid wheat (*Triticum aestivum* L.) production increased from 627 million t in 2005 to 729 million t in 2014 (<http://faostat3.fao.org>). Canada is the seventh largest wheat-producing and the second largest wheat-exporting country. Average wheat yield in Canada has increased from 2.7 t ha<sup>-1</sup> in 2005 to 3.1 t ha<sup>-1</sup> in 2014, which is equivalent to an average yield increment of 35.7 kg ha<sup>-1</sup> yr<sup>-1</sup>. Diseases and drought contribute to substantial reductions in overall wheat yields in Canada. Wheat breeders there aim to develop short, early maturing cultivars, with high grain yield and protein content, combined with resistance to major diseases, such as leaf, stem and yellow rusts caused by *Puccinia* sp., fusarium head blight caused by *Fusarium graminearum* and common bunt caused by both *Tilletia tritici* and *T. laevis* (<http://www.pgdc.ca>).

Wheat breeders, in addition to phenotypic selection, employ molecular markers in their breeding programs for different purposes, including parental selection, quality control analysis of advanced lines (cultivars) on genetic purity and identity, and for marker-assisted selection (MAS) [1]. The use of molecular markers in MAS requires identification of a subset of markers that are significantly associated with one or more genes or quantitative trait loci (QTLs) that regulate the expression of a trait of interest [2]. Both linkage-based QTL analysis and association mapping can be used to identify significant marker-trait associations, with each method having its own strength and weaknesses. Linkage-based QTL analysis depends on well-defined populations derived by crossing two parents with contrasting phenotype, which includes F<sub>2</sub> or their derivatives, backcross, doubled haploid (DH), recombinant inbred lines (RILs), and near isogenic lines (NILs) [2, 3]. In wheat, RIL, NIL and DH are the most commonly used mapping populations, because they are homozygous and can be exchanged between different collaborators for both phenotyping and genotyping purposes [3]. However, NILs and RILs require long time and/or high cost to develop, and (ii) both populations only detect the additive effect but do not provide any information on dominant effect for any QTL [2, 4].

Several mapping studies associated with grain yield and other agronomic traits have been conducted for many years [5–12]. Recently, our group mapped QTLs associated with flowering, maturity, plant height and grain yield in a RIL population derived from the cross of two spring wheat cultivars, ‘Cutler’ and ‘AC Barrie’ [8]. The population was phenotyped in replicated field trials in four environments between 2007 and 2011, and genotyped with 488 microsatellite or simple sequence repeat (SSR) and diversity arrays technology (DArT) markers. That study uncovered seven QTLs on chromosomes 1B, 1D, 4A and 5B, of which only three QTLs were associated with the phenotypic data combined across all four environments. This included *QEps.dms-1B1* for both flowering and maturity, *QEps.dms-1B2* for maturity and *QEps.dms-5B1* for flowering time. One drawback of that study was low marker density (low genome coverage), which varied from 2 on chromosomes 4D and 6D to 57 on chromosome 2B, with an average of 23 markers per chromosome. DArT markers enable the simultaneous typing of several hundred polymorphic loci spread over the genome [13–15], but the dominant inheritance (present vs. absent variation) of DArT markers is one of the major drawbacks, as homozygous dominant and heterozygous individuals cannot be easily identified. SSR markers are widely used by wheat researchers for different reasons, including wide availability, co-dominant inheritance, multiallelism, high polymorphism, uniform distribution, and high

polymorphic information content [16, 17]. SSRs are considered repeatable across laboratories [17], but their repeatability depends on several factors, including the nature of the study (mapping or marker-assisted selection in biparental populations that basically have a maximum of two segregating alleles per loci vs. genetic diversity and association mapping studies in diverse set of germplasm that have multiple alleles per loci), marker repeat length (di-, tri-, tetra- or penta-nucleotides), and the fragment separation methods (agarose gels, polyacrylamide gels, gel-based DNA sequencers or capillary DNA sequencers). Furthermore, most *Taq* DNA polymerases used for DNA synthesis add an extra base (usually an adenine) at the end of the amplified fragments [18], which generate spurious bands or peaks [19]. Hence, SSR markers produced by different laboratories or the same lab at different times using DNA sequencers are often difficult in comparing, due to inconsistencies in allele size calling caused by the large variety of automatic DNA sequencing machines used for fragment analyses, each providing different migration, fluorescent dyes, and allele calling software [20]. Furthermore, SSR markers have lower throughput as compared with the highly multiplexed single nucleotide polymorphism (SNP) genotyping platforms and genotyping by sequencing [21]. Currently, SNPs have become very popular for a wide range of applications due to high potential for automation that allows low cost and high throughput genotyping, high genomic coverage, co-dominant inheritance, and low genotyping error rates [22–24]. A total of 81,587 (90K) gene-associated SNPs are available for wheat researchers through the iSelect platform [25]. The consensus genetic position of 43,999 of the 90K SNPs was determined using eight mapping populations [25], which has provided a tremendous opportunity for wheat researchers conducting research requiring high marker density. The objectives of the present study were therefore to 1) identify genomic regions associated with flowering time under greenhouse and field conditions, and maturity, plant height and grain yield under field conditions in the ‘Cutler’ × ‘AC Barrie’ RIL population using the 90K Illumina iSelect SNP array; and 2) compare the results with a previous study on the same population using 488 microsatellite and DArT markers.

## Materials and Methods

### Plant material and phenotyping

The present study was based on a subset of 158 of the 177 RILs used in our previous study [8]. The RILs were derived from  $F_{6,7}$  at the University of Alberta using a single seed descent approach from a cross between two spring wheat cultivars, ‘Cutler’ and ‘AC Barrie’ [26]. ‘AC Barrie’ is characterized as having high protein content, late maturity (compared to ‘Cutler’) and resistance to some diseases [27]. ‘Cutler’ is an early maturing and semi-dwarf cultivar from the Canadian Prairie Spring class, and possesses the dominant *Vrn-A1a*, recessive *vrn-B1* and *vrn-D1* vernalization alleles at *Vrn1* loci, and the photoperiod insensitive allele *Ppd-D1a*. ‘AC Barrie’ possesses the same vernalization genes as the ‘Cutler’ with the photoperiod sensitive allele *Ppd-D1b*. ‘Cutler’ and ‘AC Barrie’ have the mutant *Rht-D1b* and wild type *Rht-D1a* alleles, respectively.

The 158 RILs and the two parents were evaluated five times for flowering time, maturity, plant height and grain yield under field conditions and twice for flowering time under greenhouse conditions [8]. Briefly, the RIL population and the two parents were phenotyped under field conditions between May and September in 2007, 2008 (planted on 7<sup>th</sup> May and 4<sup>th</sup> June), 2011 and 2012 at the University of Alberta South Campus Crop Research facility (53°19’N, 113°35’W), Edmonton, Canada. Seeds from the  $F_{6,7}$  were initially used for phenotyping in 2007; subsequent phenotyping trials were conducted using seeds multiplied from bulk harvest of typical heads of the previous year. Each field trial was conducted in a randomized incomplete block design with two to three replications depending on seed availability. Each entry was

planted in 1.35 x 2.0 m double rows in 2007 and 2008, and 1.35 x 1.8 m with six rows in 2011 and 2012; row spacing in all field trials was 22.5 cm. All field trials were conducted in rainfed conditions using standard agronomic and cultural practices recommended for the station. Each RIL was evaluated for number of days to flowering and maturity, plant height and grain yield. As described in our previous study [8], number of days to flowering was recorded when 50% of the plants in any plot flowered (i.e., when 50% of spikes in an plot had completely emerged out of the flag leaf), while maturity was determined when 50% of the peduncles in a plot had completely lost green color. Days to flowering and maturity were converted into growing degree days by summing the average daily temperatures (over a base temperature of 0°C) from the date of seeding to the date when flowering or maturity was recorded [8]. The RILs and the parents were also evaluated for flowering time in a randomized incomplete block design with four replications under greenhouse conditions in 2006 and 2008 as described in our previous study [8]. All except the 2012 phenotype data used in the present study are the same as our previous study.

### DNA extraction and genotyping

Genomic DNA was extracted from three weeks old seedlings using a modified Cetyl Trimethyl Ammonium Bromide (CTAB) method [28]. DNA concentration was measured using a Nano-Drop ND-1000 Spectrophotometer (Thermo Scientific, USA), and normalized to 100 ng/ $\mu$ L. DNA sample were genotyped at the University of Saskatchewan Wheat Genomics lab, Saskatoon, Canada, with the 90K Illumina iSelect SNP array [25]. Alleles were called with the Illumina Genome Studio Polyploid Clustering version 1.0 software (Illumina, San Diego, USA) using default clustering parameters. Initially, all SNPs with more than three clusters were excluded from scoring. Because of the polyploidy nature of bread wheat, it was impossible to determine the actual nucleotide variant(s) in the 90K that are responsible for the observed polymorphism, because the actual variant calls may be influenced by off target variants (i.e., a cluster does not necessarily mean variant based on the source sequence file). Thus, additional filtering was done to select only those SNPs that segregated in a biallelic pattern and that were known to be allelic based on co-segregation with data from multiple mapping populations available to our programs.

We also genotyped the RIL population and the parents with *Ppd-D1* [29] and *Rht-D1* [30] at the Agricultural Genomics and Proteomics lab, University of Alberta, Edmonton, Canada. PCR was performed in 96-well plates in a total reaction volume of 10  $\mu$ L that consisted of 50 ng template DNA, 1 $\times$  magnesium-free PCR buffer, 1.5 mM MgCl<sub>2</sub>, 0.50  $\mu$ M of each of the forward and reverse primer, 0.20 mM of each dNTP, and 1 unit GoTaq® Flexi DNA polymerase. All PCR components were purchased from Promega, USA. PCR amplifications were performed using Gene-Amp PCR System 9600 (PE-Applied Biosystems) as follows: 3 min initial denaturation at 94°C, followed by 40 cycles of 94°C for 30 sec, 60°C for 30 sec and 72°C for 30 sec, and a final extension of 7 min at 72°C. PCR fragments were separated with QIAxcel Advanced (Qiagen, USA) as described in the user's manual using fast analysis kit (with 50 bp to 1.5 kb QX DNA size marker, 15 bp to 3 kb QX alignment marker, and DM150 analysis method).

### Statistical analyses

Least square means, F statistics and heritability were obtained using PROC MIXED and PROC IML in SAS version 9.3 (SAS Institute Inc. Cary, USA). We analysed each trial (environment) separately and then combined across all environments. Genotypes were considered fixed, while replications, blocks and years were considered random. For each trait, both test for normality and the frequency distribution were done using MiniTab v14. All SNPs that were monomorphic between the two parents and those with >20% missing data were excluded from linkage

mapping. Linkage maps for the remaining SNPs and the two functional markers (*Ppd-D1* and *Rht-D1*) were constructed in two steps. First, 'draft' linkage maps were generated using the minimum spanning tree map (MSTMap) software [31] using a stringent cut off p-value of  $1^{-10}$  and a maximum distance between markers of 15 cM. Second, the 'draft' maps were refined using the MapDisto version 1.7.5 software [32] using a cut off recombination value of 0.35, a minimum LOD score of 3.0 and Kosambi mapping function [33]. The best order of markers was generated using both "AutoCheckInversions" and "AutoRipple" commands. Linkage groups were assigned to chromosomes based on existing high density SNP maps of wheat [25, 34, 35]. For each SNP, chromosome arm was inferred from the draft sequence of the hexaploid wheat [36].

Composite interval mapping (CIM) was performed on the least square means of each trait using PLABQTL version 1.2 [37] with the following parameters: a minimum LOD score of 3.0, automatic cofactor selection, walking speed of 1 cM, a model to determine additive effects at individual QTL and additive x additive epistatic interactions, and F-to-Enter value of ten [38]. Additive effect is half the difference between the genotypic values of the two parents and the sign of the additive effect was used to identify the parental origin of the favorable alleles. In addition, we also computed the difference in phenotypic values of all RILs that had the 'Cutler' alleles at the two flanking markers of each QTL and those RILs that had the 'AC Barrie' alleles. QTL names were designated following the International Rules of Genetic Nomenclature (<http://wheat.pw.usda.gov/ggpages/wgc/98/Intro.htm>), which consisted of trait acronym, lab designation (dms = Dean Michael Spaner), and chromosome. In this study, QTLs that explained <10%, 10–20% and >20% of the total phenotypic variation ( $R^2$ ) were arbitrarily classified into minor, moderate and major effect QTLs, respectively. Genetic maps and QTL graphs were drawn using MapChart v2.1 [39].

## Results

### Summary of the phenotypic traits and markers

'Cutler' flowered/matured 2.6 days earlier and was 12.9 cm shorter, but produced 154.9 kg ha<sup>-1</sup> lower grain yield than 'AC Barrie'. The average plant height among the 158 RILs varied from 66 to 104 cm, and required between 49 and 58 days for flowering and between 91 and 101 days for maturity. Mean grain yield of the RILs varied between 4.6 and 7.4 t ha<sup>-1</sup> (S1 Table). Broad sense heritability was 0.27 for grain yield, 0.43 for number of days to flowering, 0.48 for degree days to flowering, 0.50 for number of days to maturity, 0.46 for degree days to maturity, and 0.80 for plant height (S1 Table). Analysis of variance showed significant ( $p < 0.001$ ) differences among genotypes for all traits (S1 Table). The distribution of least square means estimated from the combined phenotype data of all environments was normal ( $P \geq 0.073$ ) for flowering time, maturity, and grain yield. However, the Shapiro-Wilk test rejected the hypothesis of normality ( $P = 0.010$ ) for plant height, which showed approximately bimodal distribution (Fig 1) than a more quantitative frequency distribution.

Among the 81,587 SNPs used for genotyping the RIL population, approximately 87% of the SNPs (71,245 out of the 81,587 SNPs) were discarded for a number of reasons, including lack of polymorphism between the two parents, high (>20%) missing data, very high segregation distortion, and lack of linkage with other markers. The remaining 10,342 SNPs (12.7%) were incorporated in to the genetic linkage maps of the 21 chromosomes (Table 1, S2 Table). However, many SNPs co-segregated (mapped at exactly the same position), so they were excluded from the final dataset. Hence, only 1,809 of the 81,587 SNPs (2.2%) and two gene-based functional markers (*Rht-D1b* and *Ppd-D1a*) were used for QTL analyses, which is summarized in Table 1. The number of markers retained for QTL mapping varied from 9 on 5D to 221 on 5B, with an average of 86 markers per chromosome. The total map length across the 21

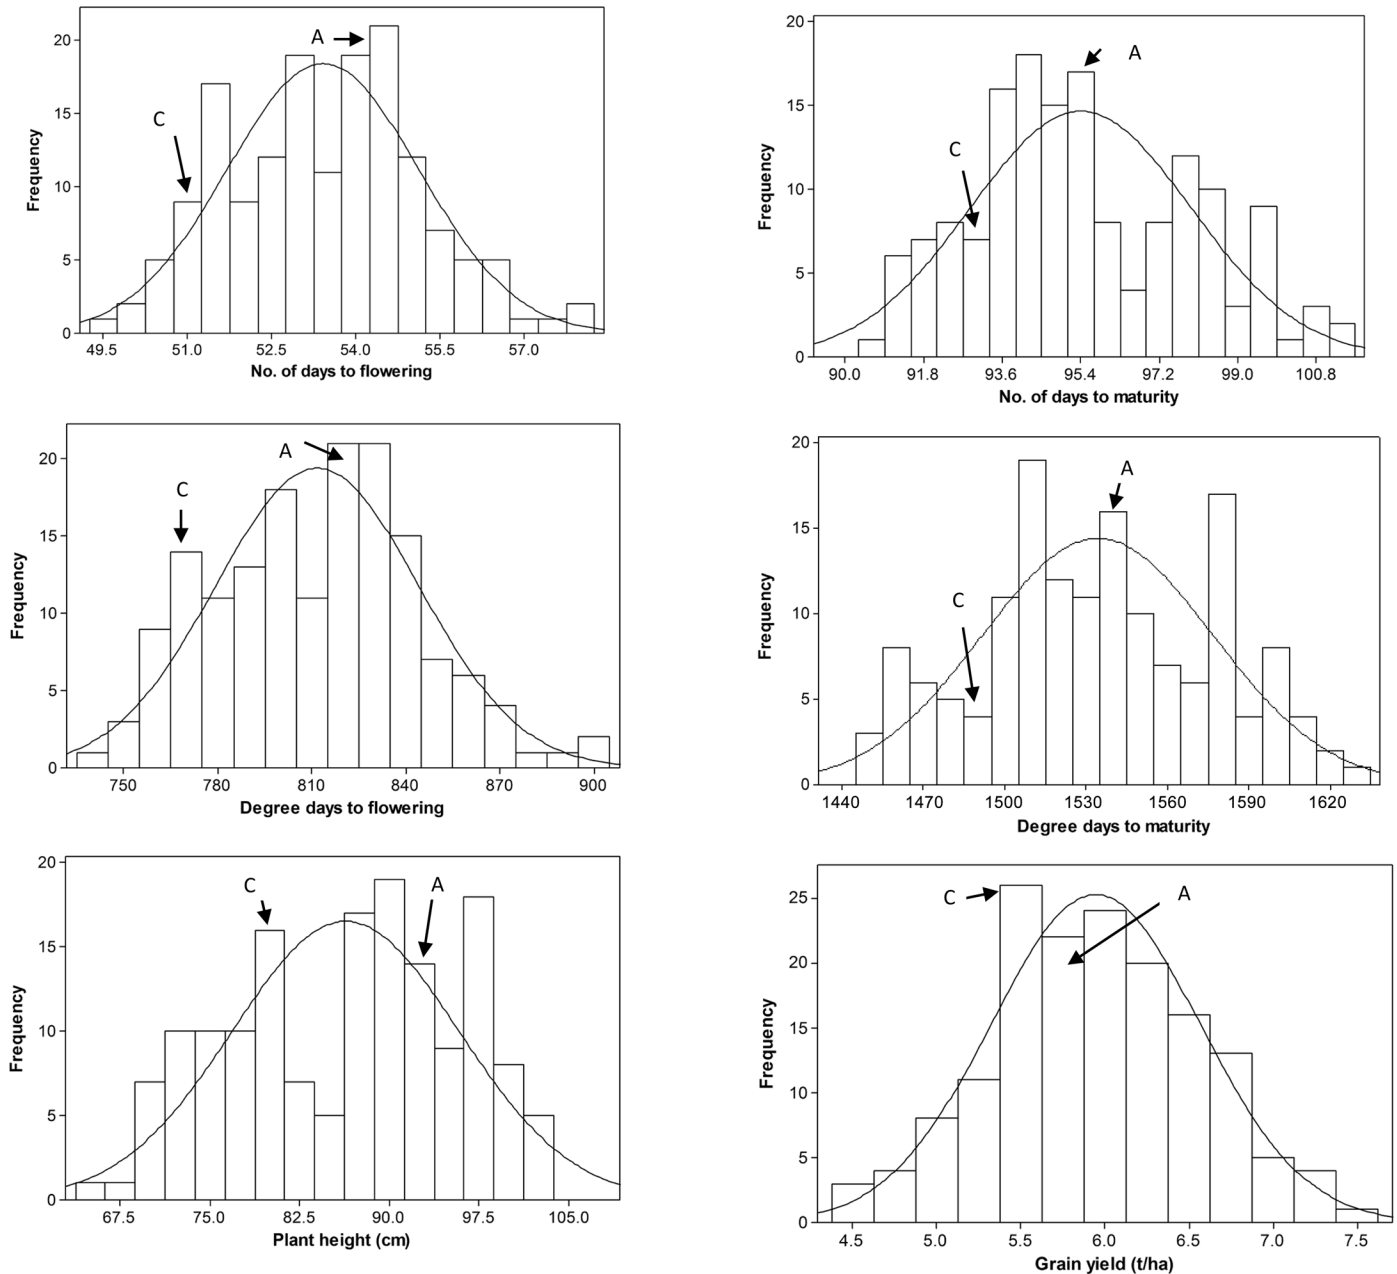

**Fig 1. Frequency distribution of least square means computed from the combined data of five environments.** The arrows indicate values of the two parents (C = Cutler; A = AC Barrie). 'Cutler' flowered and matured 2.6 days earlier, 12.9 cm shorter but produced 154.9 kg ha<sup>-1</sup> lower grain yield than 'AC Barrie'.

doi:10.1371/journal.pone.0160623.g001

chromosomes was 3996 cM, with each chromosome varying in length from 22.3 cM on 5D to 373.7 cM on 5A. Map distance between adjacent markers (inter-marker interval) varied from 0.1 to 32.5 cM (Fig 2) and the overall average was 2.2 cM.

### QTL analyses

Composite interval mapping (CIM) was performed on the least square means estimated for individual environments and also combined across two environments for flowering time under

**Table 1. Summary of the polymorphic markers integrated in to the 21 chromosomes based on 158 recombinant inbred lines derived from a cross between two spring wheat cultivars, ‘Cutler’ x ‘AC Barrie’.** Chromosome 2A, 3A, 3B, 5A and 7B each has two linkage groups.

| Linkage group | Total number of mapped markers | Total map length (cM) | No. of markers used for mapping | Map length used for mapping (cM) | Mean map distance/Marker |
|---------------|--------------------------------|-----------------------|---------------------------------|----------------------------------|--------------------------|
| 1A            | 429                            | 178.2                 | 101                             | 178.2                            | 1.8                      |
| 1B            | 693                            | 212.7                 | 124                             | 212.7                            | 1.7                      |
| 1D            | 264                            | 118.4                 | 46                              | 118.4                            | 2.6                      |
| 2A            | 414                            | 287.4                 | 111                             | 287.4                            | 2.6                      |
| 2A_LG2        | 54                             | 11.9                  | 7                               | 11.9                             | 1.7                      |
| 2B            | 1539                           | 229.3                 | 173                             | 229.3                            | 1.3                      |
| 2D            | 245                            | 116.0                 | 15                              | 97.443                           | 6.5                      |
| 3A            | 453                            | 261.2                 | 83                              | 261.2                            | 3.1                      |
| 3A_LG2        | 61                             | 65.4                  | 23                              | 65.4                             | 2.8                      |
| 3B            | 586                            | 150.6                 | 107                             | 150.6                            | 1.4                      |
| 3B_LG2        | 124                            | 140.4                 | 22                              | 140.4                            | 6.4                      |
| 3D            | 45                             | 96.4                  | 30                              | 96.4                             | 3.2                      |
| 4A            | 538                            | 237.2                 | 121                             | 237.2                            | 2.0                      |
| 4B            | 471                            | 244.2                 | 91                              | 244.2                            | 2.7                      |
| 4D            | 47                             | 125.1                 | 18                              | 74.848                           | 4.2                      |
| 5A            | 432                            | 254.6                 | 72                              | 254.6                            | 3.5                      |
| 5A_LG2        | 106                            | 119.1                 | 36                              | 119.1                            | 3.3                      |
| 5B            | 1438                           | 214.2                 | 221                             | 214.2                            | 1.0                      |
| 5D            | 37                             | 22.3                  | 9                               | 22.3                             | 2.5                      |
| 6A            | 523                            | 200.2                 | 73                              | 200.2                            | 2.7                      |
| 6B            | 440                            | 229.0                 | 67                              | 229                              | 3.4                      |
| 6D            | 76                             | 43.0                  | 9                               | 43                               | 4.8                      |
| 7A            | 737                            | 201.8                 | 145                             | 201.8                            | 1.4                      |
| 7B            | 313                            | 124.5                 | 52                              | 124.5                            | 2.4                      |
| 7B_LG2        | 190                            | 44.0                  | 21                              | 44                               | 2.1                      |
| 7D            | 89                             | 137.7                 | 34                              | 137.7                            | 4.1                      |
| Total         | 10,344                         | 4,064.8               | 1,811                           | 3,996.0                          |                          |

doi:10.1371/journal.pone.0160623.t001

greenhouse and five environments for flowering time, maturity, plant height and grain yield under field conditions. [Table 2](#) shows summary of the QTLs for the combined environments, while both [Fig 3](#) and [S3 Table](#) show detailed results for both single and combined environments. We found 5 QTLs associated with the two years combined flowering time data under greenhouse, which altogether explained 73.1% of the phenotypic variance. The five QTLs for flowering time under greenhouse mapped at the proximal tip of chromosome 2DS (*QFlt.dms-2D*), at 187 cM on 5A (*QFlt.dms-5A.1*), at 44 cM on 5B (*QFlt.dms-5B*), at 59 cM on 6B (*QFlt.dms-6B.1*) and at 5 cM on 7A (*QFlt.dms-7A.1*). The proportion of phenotypic variance explained by each flowering time QTL under greenhouse varied from 6.9% for *QFlt.dms-5A.1* to 36.6% for *QFlt.dms-2D*. *QFlt.dms-2D* is the only major effect QTL for flowering time under greenhouse, flanked by the known photoperiod insensitive allele *Ppd-D1a* and SNP marker (wsnp\_CAP11\_c3842\_1829821) ([Table 2](#)). For the combined phenotype data across all five environments conducted under field conditions, there were 4–6 QTLs for flowering time, 4–5 QTLs for maturity, one QTL for plant height, and two QTLs for grain yield ([Table 2](#), [Fig 3](#)). We found four QTLs (*QFlt.dms-2D*, *QFlt.dms-3B*, *QFlt.dms-6B.2* and *QFlt.dms-7A.1*) associated with the number of days to flowering and six QTLs (*QFlt.dms-2D*, *QFlt.dms-3B*, *QFlt.dms-6B.2*, *QFlt.dms-7A.1*, *QFlt.dms-4A.1* and *QFlt.dms-5A.2*) for degree days to flowering. Four of

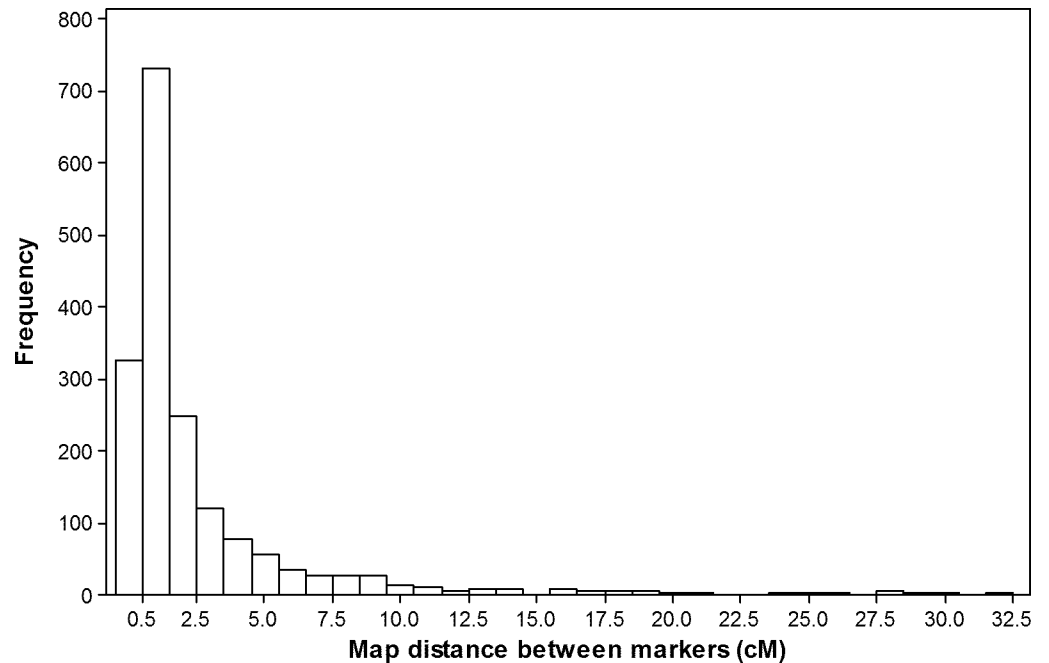

**Fig 2. Observed frequency distribution of linkage map distances between adjacent loci based on the 1811 markers mapped to the 21 hexaploid wheat chromosomes.**

doi:10.1371/journal.pone.0160623.g002

the QTLs for flowering time under field conditions (*QFlt.dms-2D*, *QFlt.dms-3B*, *QFlt.dms-6B.2* and *QFlt.dms-7A*) were common between the number of days and degree days. For maturity, we found four QTLs (*QMat.dms-2D*, *QMat.dms-4A.2*, *QMat.dms-4D.1* and *QMat.dms-7A.2*) for the number of days to maturity and five QTLs (*QMat.dms-2D*, *QMat.dms-4A.1*, *QMat.dms-4D.2*, *QMat.dms-7A.1* and *QMat.dms-7A.2*) for maturity in degree days, but only two QTLs (*QMat.dms-2D* and *QMat.dms-7A.2*) were common between the two datasets. To account for the difference in temperature across years, therefore, we only present details for the QTLs associated with flowering time and maturity in growing degree days.

The total phenotypic variance explained by all QTLs associated with flowering time and maturity in degree days, plant height and grain yield across the combined data of the five environments was 74.8, 63.7, 37.8 and 16.3%, respectively. All QTLs associated with each trait exhibited mainly additive effects and QTL by QTL interactions were negligible ( $R^2 < 1.5\%$ ). The six QTLs associated with flowering time (in degree days) mapped at the proximal tip of 2DS (*QFlt.dms-2D*), at 94 cM on 3B (*QFlt.dms-3B*), at 41 cM on 4A (*QFlt.dms-4A.1*), at 253 cM on 5A (*QFlt.dms-5A.2*), at 118 cM on 6B (*QFlt.dms-6B.2*) and at 9 cM on 7A (*QFlt.dms-7A.1*). Each QTL individually explained between 6.3 and 25.4% of the phenotypic variance across the five environments (Table 2), with *QFlt.dms-2D* as the only major effect QTL for flowering time under field conditions. The favorable alleles for all flowering QTLs except *QFlt.dms-3B* and *QFlt.dms-5A.2* originated from ‘Cutler’. Lines that had the favorable alleles at the two flanking markers of each flowering QTL showed a reduction of 13.8 to 21.1 degree days on flowering time as compared with those lines that had the unfavorable alleles. When individual environments were considered (S3 Table), *QFlt.dms-2D* was consistently detected in four of the five environments, followed by *QFlt.dms-7A.1* in two environments (Fig 3); the other QTLs were identified only in a single environment.

The five QTLs associated with maturity in degree days across the combined data were located at the proximal tip of 2DS (*QMat.dms-2D*), at 41 cM on 4A (*QMat.dms-4A.1*), at 37 cM on 4D (*QMat.dms-4D.2*) plus at both 13 and 42 cM on 7A (*QMat.dms-7A.1* and *QMat.*



**Table 2. Summary of the QTLs associated with flowering time, maturity, plant height and grain yield on 158 recombinant inbred lines derived from a cross between spring wheat cultivars, 'Cutler' and 'AC Barrie'.** The results are for the combined two environments for flowering time under greenhouse and five environments for flowering time, maturity, plant height and grain yield under field conditions.

| QTL                  | Trait*           | Condition | Chrom | Position (cM) | Confidence interval (cM) | Left marker             | Right marker             | LOD  | Partial R <sup>2</sup> (%) | Additive effect** | Difference*** |
|----------------------|------------------|-----------|-------|---------------|--------------------------|-------------------------|--------------------------|------|----------------------------|-------------------|---------------|
| <i>QFlt.dms-2D</i>   | Flowering (days) | GH        | 2D    | 0             | 0–3                      | Ppd-D1a                 | wsnp_CAP11_c3842_1829821 | 16.3 | 36.6                       | -2.6              | -5.4          |
| <i>QFlt.dms-5A.1</i> | Flowering (days) | GH        | 5A    | 187           | 183–199                  | Kukri_c20258_143        | JD_c3525_1503            | 3.3  | 6.9                        | 0.9               | 2.0           |
| <i>QFlt.dms-5B</i>   | Flowering (days) | GH        | 5B    | 44            | 43–48                    | BS00063785_51           | IACX5818                 | 5.0  | 12.3                       | -1.1              | -1.8          |
| <i>QFlt.dms-6B.1</i> | Flowering (days) | GH        | 6B    | 59            | 56–60                    | Tdurum_contig11700_1247 | wsnp_Ra_c2730_5190365    | 4.2  | 10.0                       | -1.1              | -2.0          |
| <i>QFlt.dms-7A</i>   | Flowering (days) | GH        | 7A    | 5             | 4–8                      | Excalibur_c16355_712    | RAC875_c18446_521        | 3.7  | 7.3                        | -1.0              | -1.4          |
| <i>QFlt.dms-2D</i>   | Flowering (days) | Field     | 2D    | 0             | 0–5                      | Ppd-D1a                 | wsnp_CAP11_c3842_1829821 | 7.2  | 19.6                       | -0.8              | -1.1          |
| <i>QFlt.dms-3B</i>   | Flowering (days) | Field     | 3B    | 94            | 91–95                    | Excalibur_c45968_83     | CAP12_rep_c7901_114      | 5.8  | 13.5                       | 0.6               | 1.0           |
| <i>QFlt.dms-6B.2</i> | Flowering (days) | Field     | 6B    | 118           | 110–120                  | wsnp_Ex_c4124_7455225   | Kukri_c49331_77          | 3.1  | 6.7                        | -0.4              | -0.7          |
| <i>QFlt.dms-7A</i>   | Flowering (days) | Field     | 7A    | 9             | 8–10                     | Tdurum_contig11613_329  | wsnp_Ex_c30239_39179460  | 4.7  | 12.7                       | -0.5              | -0.9          |
| <i>QFlt.dms-2D</i>   | Flowering (DD)   | Field     | 2D    | 0             | 0–5                      | Ppd-D1a                 | wsnp_CAP11_c3842_1829821 | 7.8  | 25.4                       | -14.2             | -21.0         |
| <i>QFlt.dms-3B</i>   | Flowering (DD)   | Field     | 3B    | 94            | 91–95                    | Excalibur_c45968_83     | CAP12_rep_c7901_114      | 6.7  | 10.7                       | 10.6              | 19.7          |
| <i>QFlt.dms-4A</i>   | Flowering (DD)   | Field     | 4A    | 41            | 38–42                    | CAP12_rep_c4000_432     | wsnp_Ex_c54453_57331510  | 3.7  | 6.3                        | -7.6              | -17.6         |
| <i>QFlt.dms-5A.2</i> | Flowering (DD)   | Field     | 5A    | 253           | 252–254                  | Tdurum_contig86202_175  | wsnp_Ra_c10915_17888202  | 3.7  | 7.5                        | 7.5               | 16.1          |
| <i>QFlt.dms-6B.2</i> | Flowering (DD)   | Field     | 6B    | 118           | 111–120                  | wsnp_Ex_c4124_7455225   | Kukri_c49331_77          | 3.4  | 9.3                        | -7.4              | -13.8         |
| <i>QFlt.dms-7A</i>   | Flowering (DD)   | Field     | 7A    | 9             | 8–10                     | Tdurum_contig11613_329  | wsnp_Ex_c30239_39179460  | 6.4  | 15.6                       | -10.3             | -15.9         |
| <i>QMat.dms-2D</i>   | Maturity (days)  | Field     | 2D    | 0             | 0–7                      | Ppd-D1a                 | wsnp_CAP11_c3842_1829821 | 3.1  | 11.2                       | -0.7              | -1.3          |
| <i>QMat.dms-4A.2</i> | Maturity (days)  | Field     | 4A    | 53            | 51–56                    | Ra_c7973_1185           | wsnp_Ex_c10390_17007929  | 3.5  | 6.5                        | -0.7              | -1.2          |
| <i>QMat.dms-4D.1</i> | Maturity (days)  | Field     | 4D    | 26            | 19–29                    | Excalibur_c5010_1336    | Kukri_rep_c68594_530     | 4.9  | 13.4                       | 0.8               | 1.6           |
| <i>QMat.dms-7A.2</i> | Maturity (days)  | Field     | 7A    | 44            | 42–45                    | RAC875_c14982_577       | Tdurum_contig20214_279   | 3.1  | 8.8                        | 0.6               | 1.2           |
| <i>QMat.dms-2D</i>   | Maturity (DD)    | Field     | 2D    | 0             | 0–8                      | Ppd-D1a                 | wsnp_CAP11_c3842_1829821 | 3.9  | 10.4                       | -14.2             | -21.2         |
| <i>QMat.dms-4A.1</i> | Maturity (DD)    | Field     | 4A    | 41            | 35–42                    | CAP12_rep_c4000_432     | wsnp_Ex_c54453_57331510  | 3.1  | 12.0                       | -10.7             | -22.7         |
| <i>QMat.dms-4D.2</i> | Maturity (DD)    | Field     | 4D    | 37            | 34–43                    | Rht-D1b                 | wsnp_CAP11_c356_280910   | 5.7  | 16.0                       | 15.7              | 33.0          |
| <i>QMat.dms-7A.1</i> | Maturity (DD)    | Field     | 7A    | 13            | 10–16                    | wsnp_Ra_c63822_63288359 | wsnp_BG313770A_Ta_2_3    | 3.0  | 9.1                        | -11.3             | -11.2         |
| <i>QMat.dms-7A.2</i> | Maturity (DD)    | Field     | 7A    | 42            | 40–45                    | Tdurum_contig37154_190  | RAC875_c14982_577        | 5.7  | 16.2                       | 15.7              | 20.8          |
| <i>QPhl.dms-4D</i>   | Plant height     | Field     | 4D    | 37            | 35–39                    | Rht-D1b                 | wsnp_CAP11_c356_280910   | 16.2 | 37.8                       | -6.3              | -13.2         |
| <i>QYld.dms-2D</i>   | Grain yield      | Field     | 2D    | 2             | 0–12                     | Ppd-D1a                 | wsnp_CAP11_c3842_1829821 | 4.3  | 8.6                        | -248.2            | -436.0        |
| <i>QYld.dms-5B</i>   | Grain yield      | Field     | 5B    | 34            | 32–36                    | Excalibur_c30667_102    | Ku_c6193_821             | 3.7  | 7.7                        | -184.0            | -321.8        |

\* Flowering (days) = number of days to 50% flowering under greenhouse (GH) or field conditions; Maturity (days) = number of days to maturity under field condition; Flowering (DD) = flowering time in degree days; Maturity (DD) = maturity in degree days.

\*\* Additive effect is half the difference between the genotypic values of the two parents. For grain yield, negative additive effects indicate that the favorable alleles originated from 'AC Barrie'. For flowering, maturity and plant height, negative additive effects indicate the opposite (the favorable alleles originated from 'Cutler').

\*\*\* Difference = the difference in phenotypic values of all RILs that had the 'Cutler' alleles at both flanking markers of every QTL to those that had the 'AC Barrie' alleles. The units for differences are number of days or degree days for both flowering and maturity, cm for plant height, and kg ha<sup>-1</sup> for grain yield.

doi:10.1371/journal.pone.0160623.t002

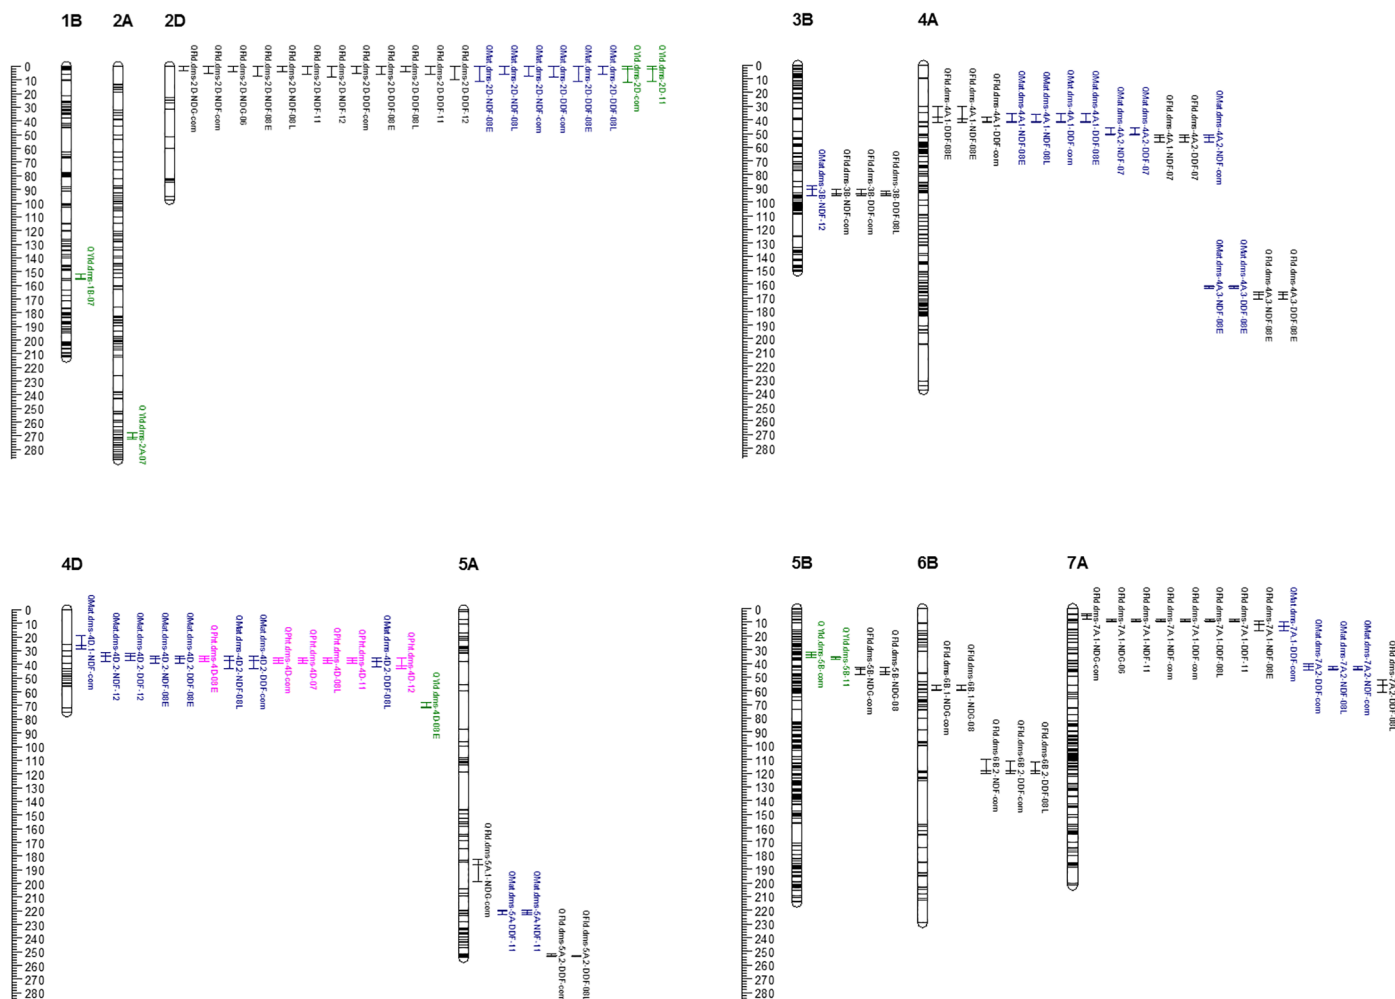

**Fig 3. Linkage map of the 10 wheat chromosomes that have at least one QTL associated with flowering time, maturity, plant height and/or grain yield.** Map position in centiMorgans (cM) is shown on the left side of the chromosomes, with each horizontal line representing a marker. QTLs names are shown on the right side of each linkage group, with bars indicating their confidence interval. QTLs for flowering, maturity, plant height and grain yield are in black, red, pink and green font, respectively. QTLs for flowering time under greenhouse have NDG-06, NDG-08 and NDG-com after chromosome number, which refers to the trials in 2006, 2008 and combined, respectively. QTLs for both flowering and maturity under field conditions have either NDF or DDF, which refers to number of days under field and degree days under field, respectively, followed by 07, 08E (early plating), 08L (late plating), 11, 12 or com after chromosome, which indicate the last two digits of the corresponding year of the trials or combined data of all trials. QTLs for plant height and grain yield have the last two digits of the trial year or com for combined. See [S3 Table](#) for details.

doi:10.1371/journal.pone.0160623.g003

*dms-7A.2*). Each maturity QTL explained between 9.1 and 16.2% of the phenotypic variance across all combined environments ([Table 2](#)). The favorable alleles for *QMat.dms-4D.2* and *QMat.dms-7A.2* originated from ‘AC Barrie’, while those for *QMat.dms-2D*, *QMat.dms-4A.1* and *QMat.dms-7A.1* from ‘Cutler’. RILs that had the favorable alleles at the two flanking markers of each QTL showed a reduction in maturity from 11.2 to 33.0 degree days than those RILs that possessed the unfavorable alleles. When results from individual environments were considered, only *QMat.dms-2D* and *QMat.dms-4D.2* were detected in two and three environments, respectively ([Fig 3](#), [S3 Table](#)); the other QTLs were detected either in a single environment or only in the combined environments (but not in any of the individual environments).

For plant height, we found a single major effect QTL that mapped at 37 cM on chromosome 4D (*QPhd.dms-4D*), flanked by a height reducing *Rht-D1b* gene and *wspn\_CAP11\_c356\_280910*.

This QTL had a LOD score of 16.2 and accounted for 37.8% of the phenotypic variance for plant height across the combined data of the five environments. RILs that had the ‘Cutler’ alleles at the two flanking markers were on average 13.2 cm shorter than those RILs that possessed the ‘AC Barrie’ alleles. When individual environments were considered, *QPhd.dms-4D1* was consistently detected within the same confidence interval in all five individual environments (Fig 3, S3 Table). The LOD score and phenotypic variance explained by this QTL on individual environments varied from 13.2 to 18.8 and from 30.8 to 38.5%, respectively, which is equivalent to a reduction in plant height by 10.7 to 14.3 cm. For grain yield, we found two QTLs at the proximal tip on 2DS (*QYld.dms-2D*) and at 34 cM on 5B (*QYld.dms-5B*), which explained 7.7 to 8.6% of the phenotypic variance for grain yield across five environments. RILs that had the ‘AC Barrie’ alleles at the two flanking markers of *QYld.dms-2D* and *QYld.dms-5B* produced on average 436.0 and 321.8 kg ha<sup>-1</sup> more grain yield than those RILs that had the ‘Cutler’ alleles. When individual environments were considered, each QTL was detected only in a single environment (Fig 3, S3 Table).

### Coincident QTLs

Four of the nineteen QTLs associated with the combined phenotype data of the four traits were common (coincident) for two or three traits. The first coincident QTL is the one that mapped at the proximal tip on chromosome 2DS, which is associated with flowering time both under greenhouse and field conditions (*QFlt.dms-2D*), maturity (*QMat.dms-2D*) and grain yield (*QYld.dms-2D*). As in our previous study [8], coincident QTLs for both flowering and maturity time belong to earliness *per se* QTL; hence, both *QFlt.dms-2D* vs *QMat.dms-2D* are named *QEps.dms-2D*. *QEps.dms-2D* explained 36.6% and 25.4% for flowering time under greenhouse and field conditions, respectively, 10.4% for maturity, and 8.6% for grain yield. RILs carrying the photoperiod insensitive mutant *Ppd-D1a* alleles from ‘Cutler’ at the two flanking markers for *QEps.dms-2D* have differed from those containing the photoperiod sensitive *Ppd-D1b* alleles from ‘AC Barrie’ for flowering time ( $p < 0.012$ ), maturity ( $p < 0.050$ ) and grain yield ( $p < 0.001$ ), but not for plant height (S4 Table). On average, therefore, RILs that had the ‘Cutler’ alleles at the two flanking markers of the *QEps.dms-2D* flowered/matured 1.1–5.4 days earlier, but suffered a yield penalty of 436 kg ha<sup>-1</sup> than those RILs that possessed the ‘AC Barrie’ alleles (Table 2). The second coincident QTL mapped at 41 cM on 4A and it was associated with both flowering time (*QFlt.dms-4A.1*) and maturity (*QMat.dms-4A.1*), here referred as *QEps.dms-4A.1*. RILs carrying the ‘Cutler’ alleles at the two flanking markers for *QEps.dms-4A.1* differed ( $p < 0.005$ ) from those containing the ‘AC Barrie’ alleles for flowering time under field conditions and maturity, but not for plant height and grain yield (S4 Table). RILs that had the ‘Cutler’ alleles at the two flanking markers for *QEps.dms-4A.1* flowered/matured 17.6–22.7 degree days earlier than those RILs that had the ‘AC Barrie’ alleles (Table 2). The third coincident QTL was on 4D and it was associated with both maturity (*QMat.dms-4D.2*) and plant height (*QPhd.dms-4D*). RILs carrying the ‘Cutler’ alleles at the two flanking markers of the coincident QTL on 4D showed significant differences ( $p < 0.001$ ) with those containing ‘AC Barrie’ alleles for maturity and plant height, but not for flowering time and grain yield (S4 Table). RILs that consisted of the ‘Cutler’ alleles at the two flanking markers of *QMat.dms-4D.2* and *QPhd.dms-4D* were 13.2 cm shorter, but took 33 degree days longer to mature than those RILs that possessed the ‘AC Barrie’ alleles (Table 2). Finally, the QTL that mapped between 8 and 16 cM on 7A was the third earliness *per se* QTL (*QEps.dms-7A*), associated with both flowering time (*QFlt.dms-7A.1*) and maturity (*QMat.dms-7A.1*), with RILs consisting of the ‘Cutler’ alleles at the two flanking markers showing a reduction in flowering/maturity by 11.2–15.9 degree days than those RILs that had the ‘AC Barrie’ alleles (Table 2). However, RILs carrying the ‘Cutler’ alleles at the two flanking markers for *QEps.dms-7A* were different from those

containing 'AC Barrie' alleles only for flowering time under field conditions ( $p < 0.001$ ), but not for maturity, plant height and grain yield (S4 Table).

## Discussion

### Comparison with our previous study

Based on 488 SSR and DArT markers, we previously reported three QTLs associated with the combined phenotypic data across four environments [8], which includes one coincident QTL for both flowering time and maturity at 31–33 cM on 1B (*QEps.dms-1B1*), one QTL for maturity at 36 cM on 1B (*QEps.dms-1B2*) and one QTL for flowering time at 76 cM on 5B (*QEps.dms-5B1*). That study failed to identify any QTL for both plant height and grain yield across the combined phenotypic data of the four environments; only two environment specific QTLs were reported for grain yield. Our previous study was based on a total map length of 2,279 cM, with individual chromosome varying from 36 to 229 cM; the overall average map distance among adjacent markers (inter-marker interval) was 4.7 cM. We thought that the low marker density might have restricted our ability to identify more QTLs with larger phenotypic effect. The use of larger number of polymorphic markers provides a more accurate overview of informative recombinations and greater saturation of genetic linkage maps. The denser the genetic maps, the lower the chance of missing true QTLs [40]. Our present study was based on 1809 polymorphic SNPs and two known gene-based functional markers (*Ppd-D1a* and *Rht-D1b*), which resulted in a total map length of 3996 cM and an overall average inter-marker interval of 2.2 cM. As compared with our previous study, therefore, the genome coverage in the present study increased by 78%, while average inter-marker interval decreased over two fold. Based on such higher genome coverage and reduction in map distance among adjacent markers, we expected to narrow down the confidence interval of the QTLs that we reported in our previous study and also uncover additional QTLs that may have been missed in our previous study. In the present study, we uncovered a total of nineteen QTLs associated with the combined phenotypic data, which includes five for flowering time in the greenhouse, six for flowering time in the field, five for maturity, one for plant height, and two for grain yield (Table 2). However, we only identified one environment specific QTL for grain yield on 1B (*QYld.dms-1B*) and one QTL for flowering time under greenhouse on 5B, but we were not sure whether these two QTLs mapped at the same confidence interval as the three QTLs (*QEps.dms-1B1*, *QEps.dms-1B2* and *QEps.dms-5B1*) reported in our previous study.

In order to verify the position of the QTLs identified on 1B and 5B in the two studies, we conducted QTL analyses using a genetic map constructed by combining DArT, SSR and SNP markers on chromosomes 1B and 5B. Only 131 out of the 158 RILs had a complete DArT, SSR and SNP genotypic data. The analyses conducted on genotypic and phenotypic data of 131 RILs and combined map of the three types of markers (DArT, SSRs and SNPs) identified one of the QTLs for maturity on 1B between 74.5 and 80.5 cM interval, which accounted for 9.7–13.1% of the phenotypic variance for maturity in degree days across the combined data plus the 2007 and 2011 environments (S5 Table). Although the genetic position for *QEps.dms-1B2* was different between the two studies (which is expected with addition of large number of SNPs into DArT and SSRs), one of the flanking DArT markers (wPt-2694) remained the same. However, the position of the QTL associated with the combined grain yield data across 5 environments (*QYld.dms-1B*) was 52 cM distal to wPt-2694, which suggests that the QTL for maturity is different from that of the QTL for grain yield. For the QTL on 5B, the analysis using combined DArT, SSR and SNP markers identified *QEps.dms-5B1*, which has been reported in our previous study [8]. In the present study, *QEps.dms-5B1* was associated with flowering time in the 2007 and maturity in the 2008 early planting environments (S5 Table). This QTL was

flanked by two DArT markers (wPt-1304 and wPt-666939), and explained between 7.6 and 11.8% of the phenotypic variance for flowering time and maturity in the individual environments. In both the previous and present studies, wPt-666939 is one of the flanking markers for *QEp.s.dms-5B1*. Therefore, the inclusion of the DArT markers on both 1B and 5B allowed us to identify the QTLs for earliness *per se* that we failed to detect using the SNP markers alone. In addition, the inclusion of DArT markers has also helped us to uncover three additional QTLs on 5B, which includes one coincident QTL for grain yield and plant height at 194–204 cM interval and one QTL for plant height (S5 Table).

However, the integration of the SSR and DArT markers with the SNPs had two limitations. First, it reduced the number of RILs with complete genotypic and phenotypic data from 158 to 131. Secondly, the SSR and DArT markers affected locus order for many SNPs, which was difficult to tell due to lack of physical positions or consensus linkage maps for the different types of markers. Third, a number of SNPs remained either unlinked or fall into several smaller linkage groups, which significantly reduced the number of markers integrated in the linkage maps. We suspected an error in the DArT genotypic data, either mislabeling and/or data coding errors during linkage map construction and QTL analyses. The second possible reason may be the use of large numbers of DArT markers in our previous study, which are primarily dominant in inheritance [13, 41]. We therefore present only QTL results obtained using the SNPs and the two functional markers (*Ppd-D1a* and *Rht-D1b*).

## Comparison with other studies

The QTLs for flowering time in the combined environments both under greenhouse and field conditions mapped on chromosomes 2D, 3B, 4A, 5A, 5B, 6B and 7A, each explaining between 6.3 and 36.6% of the phenotypic variance (Table 2). For maturity, we found QTLs on 2D, 4A, 4D and 7A, each explaining between 9.1 and 16.2% of the phenotypic variance across five environments. In a study conducted on four European winter wheat DH populations [42], the authors reported QTLs for flowering time on almost all the wheat chromosomes. In another Canadian western red spring wheat RIL population derived from a cross between ‘CDC Teal’ and ‘CDC Go’, our group has also recently reported a QTL associated with heading, flowering and maturity on chromosome 4A that accounted 8.9–20.2% of the phenotypic variance across three environments [10]. Several previous studies have reported genes and/or QTLs for both flowering time and maturity on both homoeologous group 5 [43, 44] and group 2 [45–48] chromosomes. In bread wheat, vernalization response is controlled by three *Vrn* loci (*Vrn-1*, *Vrn-2* and *Vrn-3*) of which *Vrn-A1*, *Vrn-B1* and *Vrn-D1* mapped on the long arm of chromosomes 5A, 5B and 5D, respectively [49, 50]. The three *Vrn-1* genes directly influence both flowering and maturity [51, 52]. However, we are not sure whether the QTLs for flowering time that we mapped on both 5A and 5B are in the same positions as the *Vrn-1* genes, because (i) direct comparison of the genetic map positions across different studies is not possible without having either common set of markers or physical positions; (ii) ‘Cutler’ and ‘AC Barrie’ were monomorphic for the *VRN1* loci, both having the dominant *Vrn-A1a* and recessive *vrn-B1* and *vrn-D1* alleles [26].

In the present study, we found a major effect and coincident QTL on 2D for flowering time both under greenhouse and field conditions (*QFlt.dms-2D*), maturity (*QMat.dms-2D*) and grain yield (*QYld.dms-2D*). This coincident QTL is flanked by the well-known photoperiod response *Ppd-D1a* locus, and accounted from 19.6 to 36.6% for flowering time, from 10.4 to 11.2% for maturity, and 8.6% for grain yield (Table 2). A recent genome-wide associations study for heading date in a panel of diverse European winter cultivars reported highly significant marker-trait associations at *Ppd-D1* gene [48]. In wheat, photoperiod response is

primarily controlled by the *Ppd-1* loci that mapped on the short arms of chromosomes 2D, 2B, and 2A and influences both flowering time and maturity [29, 46, 50, 53, 54]. In general, the *Ppd-D1* has been considered the strongest allele for photoperiod insensitivity, followed by *Ppd-B1* and *Ppd-A1* [47, 50, 55], but there are conflicting reports that suggests that *Ppd-B1a* could be as strong as *Ppd-D1* [45]. The favorable alleles for the flowering time/maturity and grain yield QTL on 2D originated from 'Cutler' and 'AC Barrie', respectively. If selection were to be made for the 'Cutler' alleles at all three traits, RILs carrying the mutant *Ppd-D1a* alleles from 'Cutler' at the two flanking markers showed significant ( $p < 0.05$ ) reduction on flowering/maturity, but suffered highly significant ( $p < 0.001$ ) yield penalty (i.e., it reduced grain yield by 436 kg ha<sup>-1</sup>). Coincident QTLs have been reported in several other studies [56–60], which could be due to (i) tight linkages between genes or QTLs that regulate the expression of separate traits, but the statistical method failed to discriminate them; or (ii) pleiotropic effect, the same gene or QTL may have an effect on two or more traits simultaneously [61]. In the present study, the genetic distance between the two flanking markers (*Ppd-D1a* and *w SNP\_CAP11\_c3842\_1829821*) for the coincident QTL on 2D (*QFlt.dms-2D*, *QMat.dms-2D* and *QYld.dms-2D*) is 22.6 cM, which is too large. It is, therefore, highly likely that the chromosomal segments associated with this coincident QTL on 2D carry two or more genes or QTLs, which could be determined by screening larger numbers of recombinants to break up the linkage [62].

Although the 'Cutler' and 'AC Barrie' RIL population was primarily developed to study flowering time, maturity and photoperiodism [26], results from our studies showed that 'Cutler' matured 2.6 days earlier and 12.9 cm shorter, but produced 154.9 kg ha<sup>-1</sup> lower yield than 'AC Barrie', which clearly suggests that the same population could also be used for mapping genomic regions associated with plant height and grain yield. Our previous study, however, failed to uncover QTLs for the combined plant height and grain yield data across four environments [8]. The present study identified a coincident major QTL for plant height (*QPht.dms-4D*) and medium effect QTL for maturity (*QMat.dms-4D.2*) on chromosome 4D (Table 2, Fig 3). *QPht.dms-4D* was consistently detected at the same confidence interval in all five individual environments and also combined across all environments, while *QMat.dms-4D.2* has been detected in the 2008 (both early and late planting), 2012 and combined environments (S3 Table). RILs carrying the 'Cutler' alleles at the two flanking markers of this coincident QTL on 4D showed highly significant differences ( $p < 0.005$ ) with those containing 'AC Barrie' alleles for both maturity and plant height, but not for flowering time and grain yield. Depending on the data used for analyses (individual or combined environments), this coincident QTL explained from 30.9 to 38.5% and from 13.8 to 19.3% of the phenotypic variance for plant height and maturity, respectively. RILs with the 'Cutler' alleles at the two flanking markers were on average 10.7 to 14.3 cm shorter, but required from 30.5 to 82.3 more degree days to mature than those RILs with the 'AC Barrie' alleles. Traits that showed more quantitative frequency distributions with a single peak are believed to be controlled by several QTLs, each with moderate to small individual effects, as compared to a bimodal distribution that is predominantly controlled by a single gene, clusters of tightly linked genes or few major effect QTLs [63, 64]. The least squares means of plant height across the five environments showed skewness and bimodal distribution (Fig 1). It is not therefore unexpected to uncover a large effect genomic region associated with plant height with bimodal frequency distribution. One of the flanking markers for this coincident QTL on 4D is *Rht-D1b*, a well-known semi-dwarfing gene [30, 65]. In the combined data of the five environments, the *Rht-D1b* mutant allele was present in 54 RILs and absent in 78 RILs. In hexaploid wheat, dwarfing has been achieved mainly through the introduction of *Rht-B1b* on 4B and *Rht-D1b* on 4D [30, 65], which have been introduced in many cultivars grown worldwide [66]. A recent genome-wide association studies was conducted for plant height using a set European winter and spring wheat varieties evaluated across eight environments [67]. That study reported

highly significant association between plant height and *Rht-D1*, which revealed the presence of *Rht-D1b* and *Rht-B1b* mutant alleles in 58% and 7% of the varieties, respectively.

The QTL on 4D that reduced plant height also increased days to maturity. As discussed above for the coincident QTL on 2D, coincident QTLs on 4D could also be due to either tight linkages between genes or QTLs or pleiotropic effect [61]. For example, one study fine mapped phenotypic effects segregating within a 1 cM chromosome interval in *Arabidopsis thaliana* for which lines with recombination breakpoints were available [68]. The authors found that the 1 cM chromosome interval contained two growth rate QTLs within 210 kb, which showed epistasis. In the present study, the two flanking markers (*Rht-D1b* and *w SNP\_CAP11\_c356\_280910*) for the coincident QTL on 4D (*QMat.dms-4D.2* and *QPhT.dms-4D*) are 5 cM apart, which possibly contain two or more tightly linked genes or QTLs. Additional study is needed to explore whether such major effect coincident genomic region is due to tight linkage or pleiotropic effect.

## Conclusions

There were discrepancies between our QTL results from the present and previous studies. First, we were not able to clearly confirm the flowering time and maturity QTLs on both 1B and 5B that were identified in our previous study using DArT and SSR markers. Second, the SNP and two functional markers provided us a better opportunity to uncover eight moderate effect and two major effect QTLs along with several other minor effect QTLs that were not identified in our previous study using SSR and DArT markers. The two major effect QTLs mapped on both chromosomes 2D and 4D. The QTL on 2D mapped adjacent to a well-known photoperiod response *Ppd-D1* gene and reduced flowering and maturity time up to 5 days but showed yield penalty by 436 kg ha<sup>-1</sup>. The QTL on 4D mapped adjacent to a well-known height reducing *Rht-D1* gene and reduced plant height on average by 13 cm, but increased maturity by 33 degree days. The coincident nature of the QTLs on 2D and 4D is very likely due to linkage, which may be determined by screening large numbers of recombinants to break up the linkage.

## Supporting Information

**S1 Table. Descriptive and F statistics.**

(XLSX)

**S2 Table. The position of the 10,342 single nucleotide polymorphic (SNP) markers integrated in the 'Cutler' x 'AC Barrie' linkage map.**

(XLSX)

**S3 Table. QTLs summary for both individual and combined environments.**

(XLSX)

**S4 Table. F statistics for the four coincident QTLs.**

(XLSX)

**S5 Table. Earliness *per se* QTLs on chromosomes 1B and 5B based on combined linkage map of DArT, SSR\_ and SNP markers from 131 RILs.**

(XLSX)

## Acknowledgments

The authors would like to thank Klaus Strenzke, Glen Hawkins, Lisa Raatz, Fabiana Dias, Alex Pswarayi, Joe Back, Ivan Adamyk, Henry Song, Graham Collier, Neshat Pazooki, and Rachelle Rimmer for phenotype data collection.

## Author Contributions

**Conceptualization:** DS AK MI A. Navabi.

**Formal analysis:** KS EP HC A. N'Diaye.

**Methodology:** AK MI A. Navabi A. N'Diaye CP KS.

**Supervision:** DS MI A. Navabi.

**Writing - original draft:** EP KS.

**Writing - review & editing:** DS CP AK MI A. Navabi A. N'Diaye.

## References

1. Randhawa HS, Asif M, Pozniak C, Clarke JM, Graf RJ, Fox SL, et al. Application of molecular markers to wheat breeding in Canada. *Plant Breed.* 2013; 132(5):458–71.
2. Semagn K, Bjornstad A, Xu Y. The genetic dissection of quantitative traits in crops. *Electron J Biotechnol.* 2010; 13(5): doi: <http://dx.doi.org/10.2225/vol13-issue5-fulltext-14>
3. Collard BCY, Jahufer MZZ, Brouwer JB, Pang ECK. An introduction to markers, quantitative trait loci (QTL) mapping and marker-assisted selection for crop improvement: the basic concepts. *Euphytica.* 2005; 142(1/2):169–96.
4. Haley CS, Andersson L. Linkage mapping of quantitative trait loci in plants and animals. In: Dear PH, editor. *Genome mapping: a practical approach.* 49–71. New York: Oxford University Press; 1997.
5. Huang XQ, Kempf H, Ganai MW, Roder MS. Advanced backcross QTL analysis in progenies derived from a cross between a German elite winter wheat variety and a synthetic wheat (*Triticum aestivum* L.). *Theor Appl Genet.* 2004; 109(5):933–43. PMID: [15243706](https://pubmed.ncbi.nlm.nih.gov/15243706/)
6. Kumar N, Kulwal PL, Balyan HS, Gupta PK. QTL mapping for yield and yield contributing traits in two mapping populations of bread wheat. *Mol Breed.* 2007; 19(2):163–77. doi: [10.1007/s11032-006-9056-8](https://doi.org/10.1007/s11032-006-9056-8)
7. Bennett D, Reynolds M, Mullan D, Izanloo A, Kuchel H, Langridge P, et al. Detection of two major grain yield QTL in bread wheat (*Triticum aestivum* L.) under heat, drought and high yield potential environments. *Theoretical and Applied Genetics.* 2012; 125(7):1473–85. doi: [10.1007/s00122-012-1927-2](https://doi.org/10.1007/s00122-012-1927-2) PMID: [WOS:000309881700010](https://pubmed.ncbi.nlm.nih.gov/2000309881700010/).
8. Kamran A, Iqbal M, Navabi A, Randhawa H, Pozniak C, Spaner D. Earliness *per se* QTLs and their interaction with the photoperiod insensitive allele *Ppd-D1a* in the Cutler × AC Barrie spring wheat population. *Theor Appl Genet.* 2013; 126(8):1965–76. doi: [10.1007/s00122-013-2110-0](https://doi.org/10.1007/s00122-013-2110-0) PMID: [23649650](https://pubmed.ncbi.nlm.nih.gov/23649650/)
9. Asif M, Yang RC, Navabi A, Iqbal M, Kamran A, Lara EP, et al. Mapping QTL, selection differentials, and the effect of *Rht-B1* under organic and conventionally managed systems in the Attila × CDC Go spring wheat mapping population. *Crop Sci.* 2015; 55(3):1129–42. doi: [10.2135/cropsci2014.01.0080](https://doi.org/10.2135/cropsci2014.01.0080)
10. Chen H, Iqbal M, Perez-Lara E, Yang RC, Pozniak C, Spaner D. Earliness *per se* quantitative trait loci and their interaction with *Vrn-B1* locus in a spring wheat population. *Mol Breed.* 2015; 35(9).
11. Huang XQ, Cloutier S, Lycar L, Radovanovic N, Humphreys DG, Noll JS, et al. Molecular detection of QTLs for agronomic and quality traits in a doubled haploid population derived from two Canadian wheats (*Triticum aestivum* L.). *Theor Appl Genet.* 2006; 113(4):753–66. doi: [10.1007/s00122-006-0346-7](https://doi.org/10.1007/s00122-006-0346-7) PMID: [16838135](https://pubmed.ncbi.nlm.nih.gov/16838135/)
12. Yu M, Chen GY, Zhang LQ, Liu YX, Liu DC, Wang JR, et al. QTL mapping for important agronomic traits in synthetic hexaploid wheat derived from *Aegilops tauschii* ssp. *tauschii*. *Journal of Integrative Agriculture.* 2014; 13(9):1835–44. doi: [10.1016/S2095-3119\(13\)60655-3](https://doi.org/10.1016/S2095-3119(13)60655-3)
13. Jaccoud D, Peng KM, Feinshtein D, Kilian A. Diversity Arrays: a solid state technology for sequence information independent genotyping. *Nucleic Acids Research.* 2001; 29(4). doi: [10.1093/nar/29.4.e25](https://doi.org/10.1093/nar/29.4.e25) PMID: [WOS:000207967400009](https://pubmed.ncbi.nlm.nih.gov/11800009/).
14. Wenzl P, Carling J, Kudrna D, Jaccoud D, Huttner E, Kleinbartsch A, et al. Diversity Arrays Technology (DArT) for whole-genome profiling of barley. *Proc Natl Acad Sci USA.* 2004; 101(26):9915–20. doi: [10.1073/pnas.0401076101](https://doi.org/10.1073/pnas.0401076101) PMID: [15192146](https://pubmed.ncbi.nlm.nih.gov/15192146/)
15. Semagn K, Bjornstad A, Skinnies H, Maroy AG, Tarkegne Y, William M. Distribution of DArT, AFLP, and SSR markers in a genetic linkage map of a doubled-haploid hexaploid wheat population. *Genome.* 2006; 49(5):545–55. [pii]; doi: [10.1139/g06-002](https://doi.org/10.1139/g06-002) PMID: [16767179](https://pubmed.ncbi.nlm.nih.gov/16767179/)
16. Gupta Balyan, Edwards Isaac, Korzun Roder, et al. Genetic mapping of 66 new microsatellite (SSR) loci in bread wheat. *Theor Appl Genet.* 2002; 105(2):413–22. doi: [10.1007/s00122-002-0865-9](https://doi.org/10.1007/s00122-002-0865-9)



17. Boopathi NM, Gat S, Kavitha P, Sathish S, Nithya R, Wickneswari R, et al. Evaluation and bulked segregant analysis of major yield QTL qtl12.1 introgressed into indigenous elite line for low water availability under water stress. *Rice Science*. 2013; 20(1):25–30. doi: [10.1016/s1672-6308\(13\)60104-3](https://doi.org/10.1016/s1672-6308(13)60104-3)
18. Hu G. DNA Polymerase-Catalyzed Addition of Nontemplated Extra Nucleotides to the 3' of a DNA Fragment. *DNA Cell Biol*. 1993; 12(8):763–70. doi: [10.1089/dna.1993.12.763](https://doi.org/10.1089/dna.1993.12.763) PMID: [8397833](https://pubmed.ncbi.nlm.nih.gov/8397833/)
19. Ginot F, Bordelais I, Nguyen S, Gyapay G. Correction of some genotyping errors in automated fluorescent microsatellite analysis by enzymatic removal of one base overhangs. *Nucleic Acids Res*. 1996; 24(3):540–1. doi: [10.1093/nar/24.3.540](https://doi.org/10.1093/nar/24.3.540) PMID: [8602372](https://pubmed.ncbi.nlm.nih.gov/8602372/)
20. Vignal A, Milan D, SanCristobal M, Eggen A. A review on SNP and other types of molecular markers and their use in animal genetics. *Genet Sel Evol*. 2002; 34(3):275–305. doi: [10.1051/gse:2002009](https://doi.org/10.1051/gse:2002009) PMID: [12081799](https://pubmed.ncbi.nlm.nih.gov/12081799/)
21. Elshire RJ, Glaubitz JC, Sun Q, Poland JA, Kawamoto K, Buckler ES, et al. A robust, simple genotyping-by-sequencing (GBS) approach for high diversity species. *PLoS ONE*. 2011; 6(5):e19379. doi: [10.1371/journal.pone.0019379](https://doi.org/10.1371/journal.pone.0019379) PMID: [21573248](https://pubmed.ncbi.nlm.nih.gov/21573248/)
22. Rafalski A. Applications of single nucleotide polymorphisms in crop genetics. *Current Opinion in Plant Biology*. 2002; 5(2):94–100. PMID: [11856602](https://pubmed.ncbi.nlm.nih.gov/11856602/)
23. Schlotterer C. The evolution of molecular markers—just a matter of fashion? *Nat Rev Genet*. 2004; 5(1):63–9. doi: [10.1038/nrg1249](https://doi.org/10.1038/nrg1249) PMID: [14666112](https://pubmed.ncbi.nlm.nih.gov/14666112/)
24. Semagn K, Babu R, Hearne S, Olsen M. Single nucleotide polymorphism genotyping using Kompetitive Allele Specific PCR (KASP): overview of the technology and its application in crop improvement. *Mol Breed*. 2014; 33(1):1–14. doi: [10.1007/s11032-013-9917-x](https://doi.org/10.1007/s11032-013-9917-x)
25. Wang S, Wong D, Forrest K, Allen A, Chao S, Huang BE, et al. Characterization of polyploid wheat genomic diversity using a high-density 90,000 single nucleotide polymorphism array. *Plant Biotechnol J*. 2014; 12(6):787–96. doi: [10.1111/pbi.12183](https://doi.org/10.1111/pbi.12183) PMID: [24646323](https://pubmed.ncbi.nlm.nih.gov/24646323/)
26. Iqbal M, Navabi A, Salmon DF, Yang RC, Spaner D. A genetic examination of early flowering and maturity in Canadian spring wheat. *Canadian Journal of Plant Science*. 2006; 86(4):995–1004.
27. McCaig TN, DePauw RM, Clarke JM, McLeod JG, Fernandez MR, Knox RE. AC Barrie hard red spring wheat. *Canadian Journal of Plant Science*. 1996; 76(2):337–9.
28. Doyle JJ, Doyle JL. A rapid DNA isolation procedure for small quantities of fresh leaf tissue. *Phytochem Bull*. 1987; 19:11–5.
29. Beales J, Turner A, Griffiths S, Snape JW, Laurie DA. A pseudo-response regulator is misexpressed in the photoperiod insensitive *Ppd-D1a* mutant of wheat (*Triticum aestivum* L.). *Theor Appl Genet*. 2007; 115:721–33. PMID: [17634915](https://pubmed.ncbi.nlm.nih.gov/17634915/)
30. Ellis MH, Spielmeyer W, Gale KR, Rebetzke GJ, Richards RA. Perfect markers for the *Rht-B1b* and *Rht-D1b* dwarfing genes in wheat. *Theor Appl Genet*. 2002; 105(6/7):1038–42.
31. Wu Y, Bhat PR, Close TJ, Lonardi S. Efficient and accurate construction of genetic linkage maps from the minimum spanning tree of a graph. *PLoS Genet*. 2008; 4(10):e1000212. doi: [10.1371/journal.pgen.1000212](https://doi.org/10.1371/journal.pgen.1000212) PMID: [18846212](https://pubmed.ncbi.nlm.nih.gov/18846212/)
32. Lorieux M. MapDisto: Fast and efficient computation of genetic linkage maps. *Mol Breed*. 2012; 30(2):1231–5. doi: [10.1007/s11032-012-9706-y](https://doi.org/10.1007/s11032-012-9706-y)
33. Kosambi DD. The estimation of map distances from recombination values. *Ann Eugen*. 1944; 12:172–5.
34. Cavanagh CR, Chao S, Wang S, Huang BE, Stephen S, Kiani S, et al. Genome-wide comparative diversity uncovers multiple targets of selection for improvement in hexaploid wheat landraces and cultivars. *Proc Natl Acad Sci USA*. 2013; 110(20):8057–62. doi: [10.1073/pnas.1217133110](https://doi.org/10.1073/pnas.1217133110) PMID: [23630259](https://pubmed.ncbi.nlm.nih.gov/23630259/)
35. Maccaferri M, Cane MA, Sanguineti MC, Salvi S, Colalongo MC, Massi A, et al. A consensus framework map of durum wheat (*Triticum durum* Desf.) suitable for linkage disequilibrium analysis and genome-wide association mapping. *BMC Genomics*. 2014; 15:873. doi: [10.1186/1471-2164-15-873](https://doi.org/10.1186/1471-2164-15-873) PMID: [25293821](https://pubmed.ncbi.nlm.nih.gov/25293821/)
36. Lukaszewski AJ, Alberti A, Sharpe A, Kilian A, Stanca AM, Keller B, et al. A chromosome-based draft sequence of the hexaploid bread wheat (*Triticum aestivum*) genome. *Science*. 2014; 345(6194). doi: [10.1126/science.1251788](https://doi.org/10.1126/science.1251788)
37. Utz HF, Melchinger AE. PLABQTL: A computer program to map QTL, Version 1.2.: Institute of Plant Breeding Seed Science and Population Genetics University of Hohenheim Stuttgart Germany.; 2003.
38. Semagn K, Skinnes H, Bjornstad A, Mary AG, Tarkegne Y. Quantitative trait loci controlling Fusarium head blight resistance and low deoxynivalenol content in hexaploid wheat population from 'Arina' and NK93604. *Crop Sci*. 2007; 47(1):294–303.

39. Voorrips RE. MapChart: Software for the graphical presentation of linkage maps and QTLs. *J Hered*. 2002; 93(1):77–8. doi: [10.1093/jhered/93.1.77](https://doi.org/10.1093/jhered/93.1.77) PMID: [12011185](https://pubmed.ncbi.nlm.nih.gov/12011185/)
40. Zych K, Li Y, van der Velde JK, Joosen RV, Ligterink W, Jansen RC, et al. Pheno2Geno—High-throughput generation of genetic markers and maps from molecular phenotypes for crosses between inbred strains. *BMC Bioinformatics*. 2015; 16(1):1–8. doi: [10.1186/s12859-015-0475-6](https://doi.org/10.1186/s12859-015-0475-6)
41. Akbari M, Wenzl P, Caig V, Carling J, Xia L, Yang S, et al. Diversity arrays technology (DART) for high-throughput profiling of the hexaploid wheat genome. *Theor Appl Genet*. 2006; 113(8):1409–20. doi: [10.1007/s00122-006-0365-4](https://doi.org/10.1007/s00122-006-0365-4) PMID: [17033786](https://pubmed.ncbi.nlm.nih.gov/17033786/)
42. Griffiths S, Simmonds J, Leverington M, Wang Y, Fish L, Sayers L, et al. Meta-QTL analysis of the genetic control of ear emergence in elite European winter wheat germplasm. *Theor Appl Genet*. 2009; 119(3):383–95. doi: [10.1007/s00122-009-1046-x](https://doi.org/10.1007/s00122-009-1046-x) PMID: [19430758](https://pubmed.ncbi.nlm.nih.gov/19430758/)
43. Law CN, Worland AJ. Genetic analysis of some flowering time and adaptive traits in wheat. *New Phytol*. 1997; 137(1):19–28. doi: [10.1046/j.1469-8137.1997.00814.x](https://doi.org/10.1046/j.1469-8137.1997.00814.x)
44. Yan L, Loukoianov A, Tranquilli G, Helguera M, Fahima T, Dubcovsky J. Positional cloning of the wheat vernalization gene VRN1. *Proc Natl Acad Sci USA*. 2003; 100(10):6263–8. doi: [10.1073/pnas.0937399100](https://doi.org/10.1073/pnas.0937399100) PMID: [12730378](https://pubmed.ncbi.nlm.nih.gov/12730378/)
45. Tanio M, Kato K. Development of near-isogenic lines for photoperiod-insensitive genes, Ppd-B1 and Ppd-D1, carried by the Japanese wheat cultivars and their effect on apical development. *Breeding Sci*. 2007; 57(1):65–72. doi: [10.1270/jsbbs.57.65](https://doi.org/10.1270/jsbbs.57.65)
46. Wilhelm EP, Turner AS, Laurie DA. Photoperiod insensitive *Ppd-A1a* mutations in tetraploid wheat (*Triticum durum* Desf.). *Theor Appl Genet*. 2009; 118(2):285–94. doi: [10.1007/s00122-008-0898-9](https://doi.org/10.1007/s00122-008-0898-9) PMID: [18839130](https://pubmed.ncbi.nlm.nih.gov/18839130/)
47. Worland AJ, Börner A, Korzun V, Li WM, Petrović S, Sayers EJ. The influence of photoperiod genes on the adaptability of European winter wheats. *Euphytica*. 1998; 100(1–3):385–94.
48. Zanke C, Ling J, Plieske J, Kollers S, Ebmeyer E, Korzun V, et al. Genetic architecture of main effect QTL for heading date in European winter wheat. *Frontiers in Plant Science*. 2014; 5(217):1–12. doi: [10.3389/fpls.2014.00217](https://doi.org/10.3389/fpls.2014.00217)
49. Preston JC, Kellogg EA. Discrete developmental roles for temperate cereal grass Vernalization1/fruit-full-like genes in flowering competency and the transition to flowering. *Plant Physiol*. 2008; 146(1):265–76. doi: [10.1104/pp.107.109561](https://doi.org/10.1104/pp.107.109561) PMID: [18024551](https://pubmed.ncbi.nlm.nih.gov/18024551/)
50. Chen F, Gao M, Zhang J, Zuo A, Shang X, Cui D. Molecular characterization of vernalization and response genes in bread wheat from the Yellow and Huai Valley of China. *BMC Plant Biol*. 2013; 13:199(1). doi: [10.1186/1471-2229-13-199](https://doi.org/10.1186/1471-2229-13-199)
51. Galiba G, Quarrie SA, Sutka J, Morgounov A, Snape JW. RFLP mapping of the vernalization (Vrn1) and frost resistance (Fr1) genes on chromosome 5A of wheat. *Theor Appl Genet*. 1995; 90(7–8):1174–9. doi: [10.1007/BF00222940](https://doi.org/10.1007/BF00222940) PMID: [24173081](https://pubmed.ncbi.nlm.nih.gov/24173081/)
52. Dubcovsky J, Lijavetzky D, Appendino L, Tranquilli G. Comparative RFLP mapping of Triticum monococcum genes controlling vernalization requirement. *Theor Appl Genet*. 1998; 97(5–6):968–75. doi: [10.1007/s001220050978](https://doi.org/10.1007/s001220050978)
53. Law CN, Sutka J, Worland AJ. A genetic study of day-length response in wheat. *Heredity*. 1978; 41:185–91.
54. Scarth R, Law CN. The location of the photoperiod gene, *Ppd-B1* and an additional genetic factor for ear-emergence time on chromosome 2B of wheat. *Heredity*. 1983; 51:607–19.
55. Guo Z, Song Y, Zhou R, Ren Z, Jia J. Discovery, evaluation and distribution of haplotypes of the wheat Ppd-D1 gene. *New Phytol*. 2010; 185(3):841–51. doi: [10.1111/j.1469-8137.2009.03099.x](https://doi.org/10.1111/j.1469-8137.2009.03099.x) PMID: [20002313](https://pubmed.ncbi.nlm.nih.gov/20002313/)
56. Pushpendra KG, Harindra SB, Pawan LK, Neeraj K, Ajay K, Reyazul RM, et al. QTL analysis for some quantitative traits in bread wheat. *J Zhejiang Univ Sci B*. 2007; 8(11):807–14. doi: [10.1631/jzus.2007.B0807](https://doi.org/10.1631/jzus.2007.B0807) PMID: [PMC2064952](https://pubmed.ncbi.nlm.nih.gov/PMC2064952/).
57. Bai C, Liang Y, Hawkesford MJ. Identification of QTLs associated with seedling root traits and their correlation with plant height in wheat. *J Exp Bot*. 2013; 64(6):1745–53. doi: [10.1093/jxb/ert041](https://doi.org/10.1093/jxb/ert041) PMID: [23564959](https://pubmed.ncbi.nlm.nih.gov/23564959/)
58. Quarrie SA, Pekic Quarrie S, Radosevic R, Rancic D, Kaminska A, Barnes JD, et al. Dissecting a wheat QTL for yield present in a range of environments: From the QTL to candidate genes. *J Exp Botany*. 2006; 57(11):2627–37. doi: [10.1093/jxb/erl026](https://doi.org/10.1093/jxb/erl026)
59. Babu R, Nguyen B, Chamarerer V, Shanmugasundaram P, Chezhan P, Jeyaprakash P, et al. Genetic analysis of drought resistance in rice by molecular markers: association between secondary traits and field performance. *Crop Sci*. 2003; 43:1457–69. doi: [10.2135/cropsci2003.1457](https://doi.org/10.2135/cropsci2003.1457)

60. Lanceras J, Pantuwan G, Jongdee B, Toojinda T. Quantitative trait loci associated with drought tolerance at reproductive stage in rice. *Plant Physiol.* 2004; 135:384–99. doi: [10.1104/pp.103.035527](https://doi.org/10.1104/pp.103.035527) PMID: [15122029](https://pubmed.ncbi.nlm.nih.gov/15122029/)
61. Tuberosa R, Salvi S, Sanguineti MC, Landi P, Maccaferri M, Conti S. Mapping QTLs regulating morpho-physiological traits and yield: Case studies, shortcomings and perspectives in drought-stressed maize. *Ann Bot.* 2002; 89(SPEC. ISS.):941–63. doi: [10.1093/aob/mcf134](https://doi.org/10.1093/aob/mcf134) PMID: [12102519](https://pubmed.ncbi.nlm.nih.gov/12102519/)
62. Kolb F, Bai G, Muehlbauer G, Anderson J, Smith K, Fedak G. Host plant resistance genes for Fusarium head blight. *Crop Science.* 2001; 41(3):611–9.
63. Chee PW, Elias EM, Anderson JA, Kianian SF. Evaluation of a high grain protein QTL from *Triticum turgidum* L. var. *dicoccoides* in an adapted durum wheat background. *Crop Sci.* 2001; 41(2):295–301.
64. Buerstmayr H, Lemmens M, Hartl L, Doldi L, Steiner B, Stierschneider M, et al. Molecular mapping of QTLs for Fusarium head blight resistance in spring wheat. I. Resistance to fungal spread (type II resistance). *Theor Appl Genet.* 2002; 104(1):84–91. doi: [10.1007/s001220200009](https://doi.org/10.1007/s001220200009) PMID: [12579431](https://pubmed.ncbi.nlm.nih.gov/12579431/)
65. Pearce S, Saville R, Vaughan SP, Chandler PM, Wilhelm EP, Sparks CA, et al. Molecular characterization of *Rht-1* dwarfing genes in hexaploid wheat. *Plant Physiol.* 2011; 157(4):1820–31. doi: [10.1104/pp.111.183657](https://doi.org/10.1104/pp.111.183657) PMID: [22013218](https://pubmed.ncbi.nlm.nih.gov/22013218/)
66. Evans L. Feeding the ten billion: Plants and population growth. Cambridge, UK.: Cambridge University Press; 1998.
67. Zanke CD, Ling J, Plieske J, Kollers S, Ebmeyer E, Korzun V, et al. Whole genome association mapping of plant height in winter wheat (*Triticum aestivum* L). *PLoS ONE.* 2014; 9(11):e113287. doi: [10.1371/journal.pone.0113287](https://doi.org/10.1371/journal.pone.0113287) PMID: [25405621](https://pubmed.ncbi.nlm.nih.gov/25405621/)
68. Kroymann J, Mitchell-Olds T. Epistasis and balanced polymorphism influencing complex trait variation. *Nature (London).* 2005; 435(7038):95–8.
